# Supplementary material
Source: Springer Nature journal article supplement (https://www.springermedizin.de/resource/supplementary/12958_2013_1171_MOESM3_ESM.pdf/9566698)

**A****Proöstrus**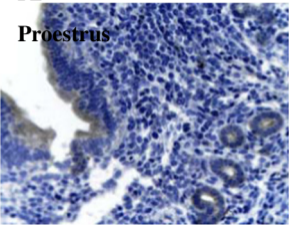**Estrus**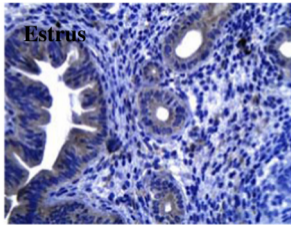**Metestrus**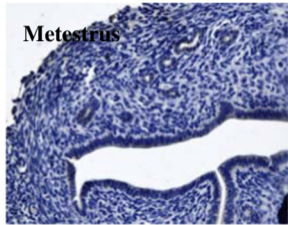**Diestrus**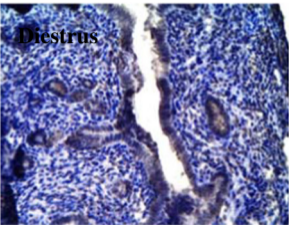**Negative controls**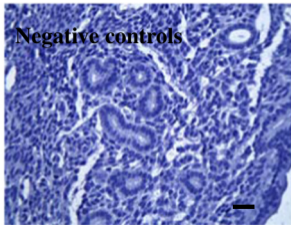**B**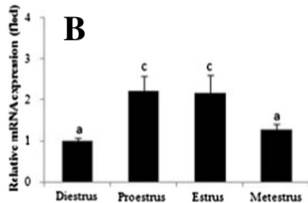

Supplement: MOESM3 [file 9566698]
